# Supplementary material
Source: publisher figshare collection journal article supplement (https://frontiersin.figshare.com/ndownloader/files/29596353)
Supplement: Supplementary file [file 29596353]

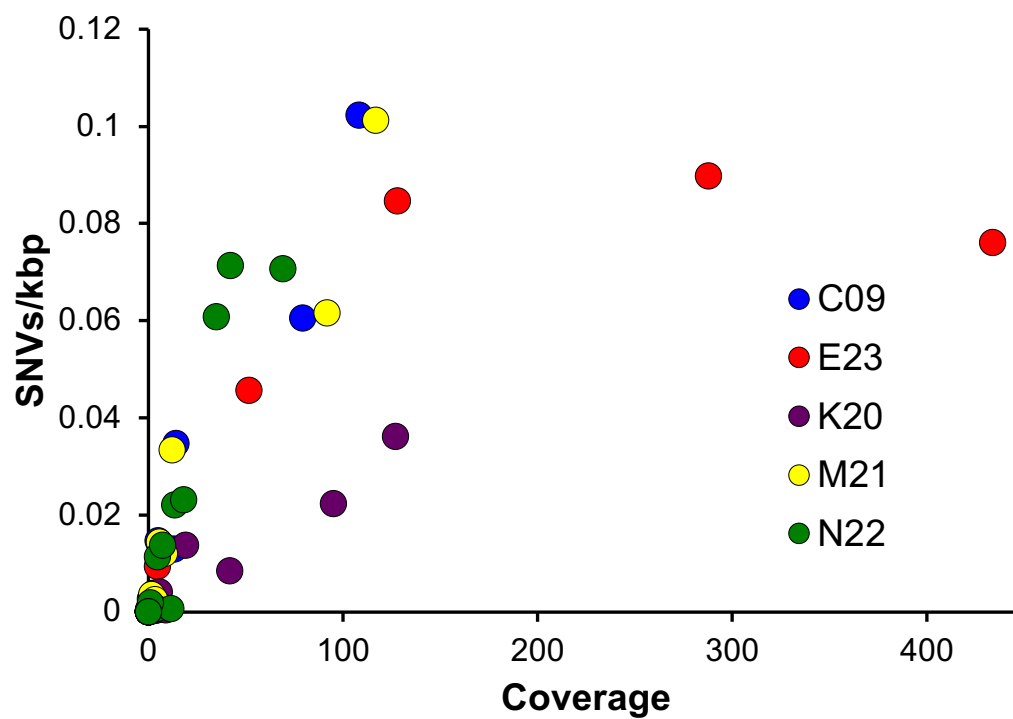

**Supplementary Figure 4.** Scatterplots of average mapping coverage vs average number of SNVs per kilobase pair of DNA for metagenomic mappings, colored by SAG. Each point represents data from a different metagenome mapped to each SAG.
